# Supplementary figures and images for: Endothelial cell-derived CD95 ligand serves as a chemokine in induction of neutrophil slow rolling and adhesion
Source: eLife journal article supplement (doi:10.7554/elife.18542), 2016-10-20

Figure 2-figure supplement 1

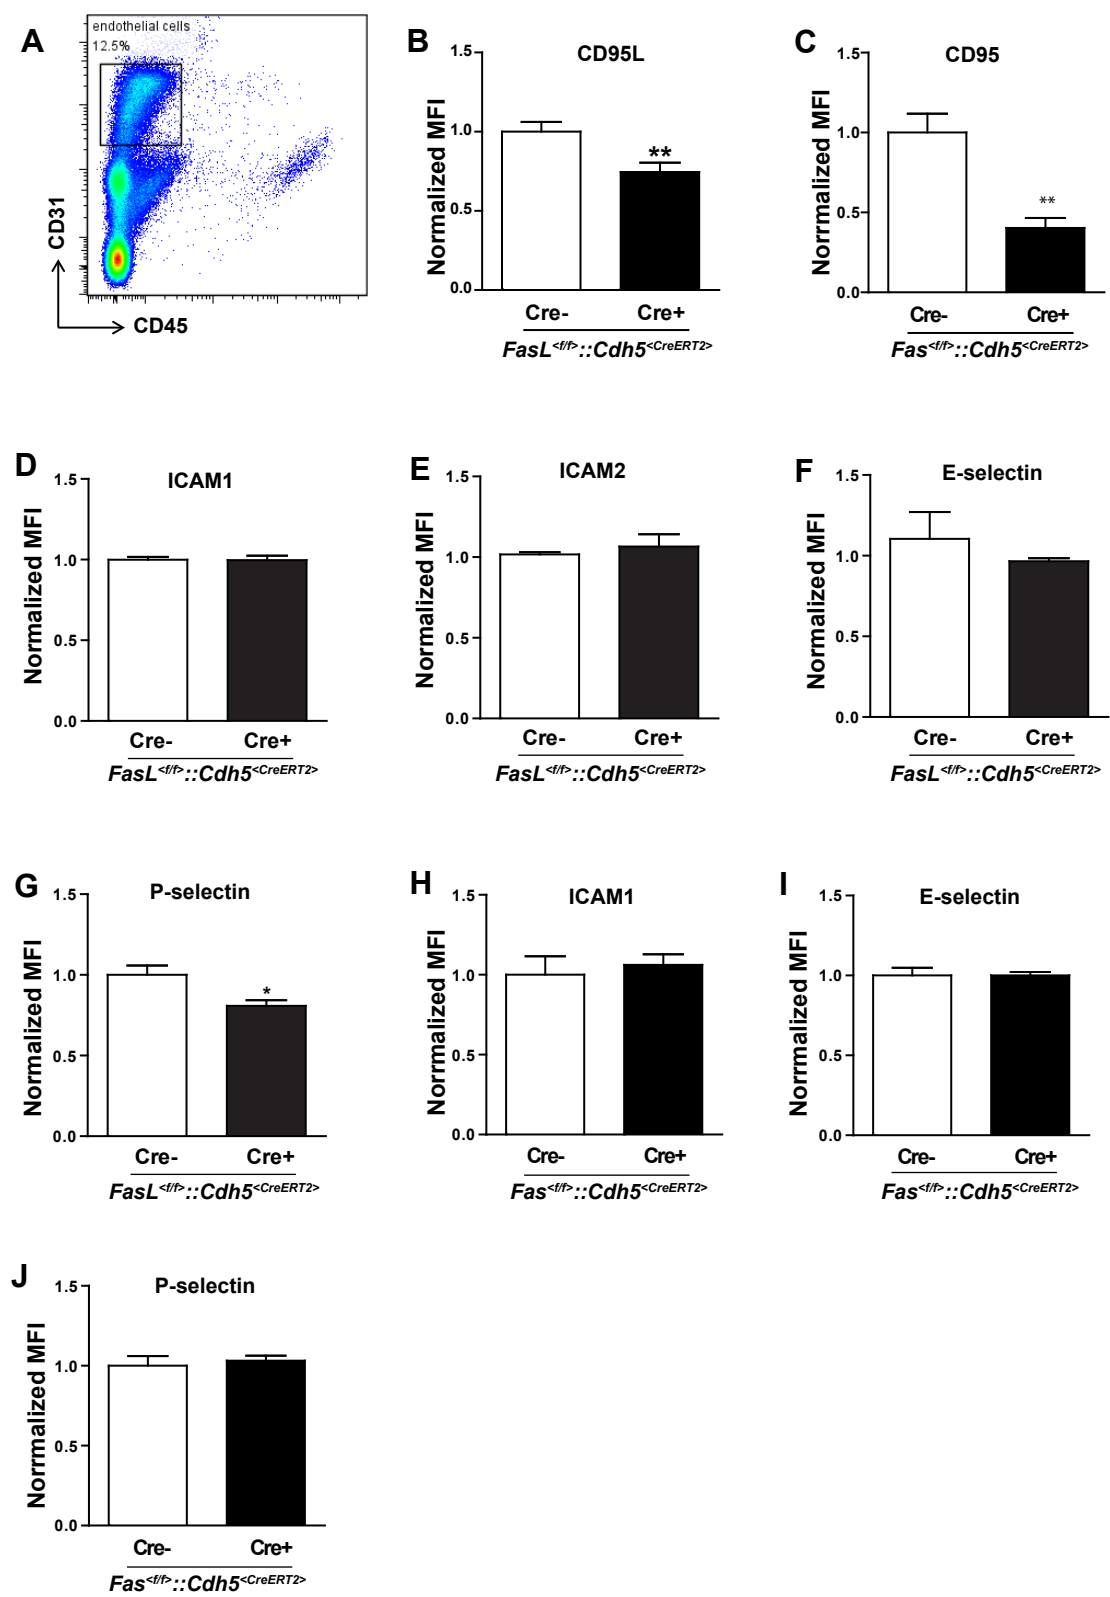

Supplement: supp [file elife-18542-supp-v1.zip]

Figure 1-figure supplement 2

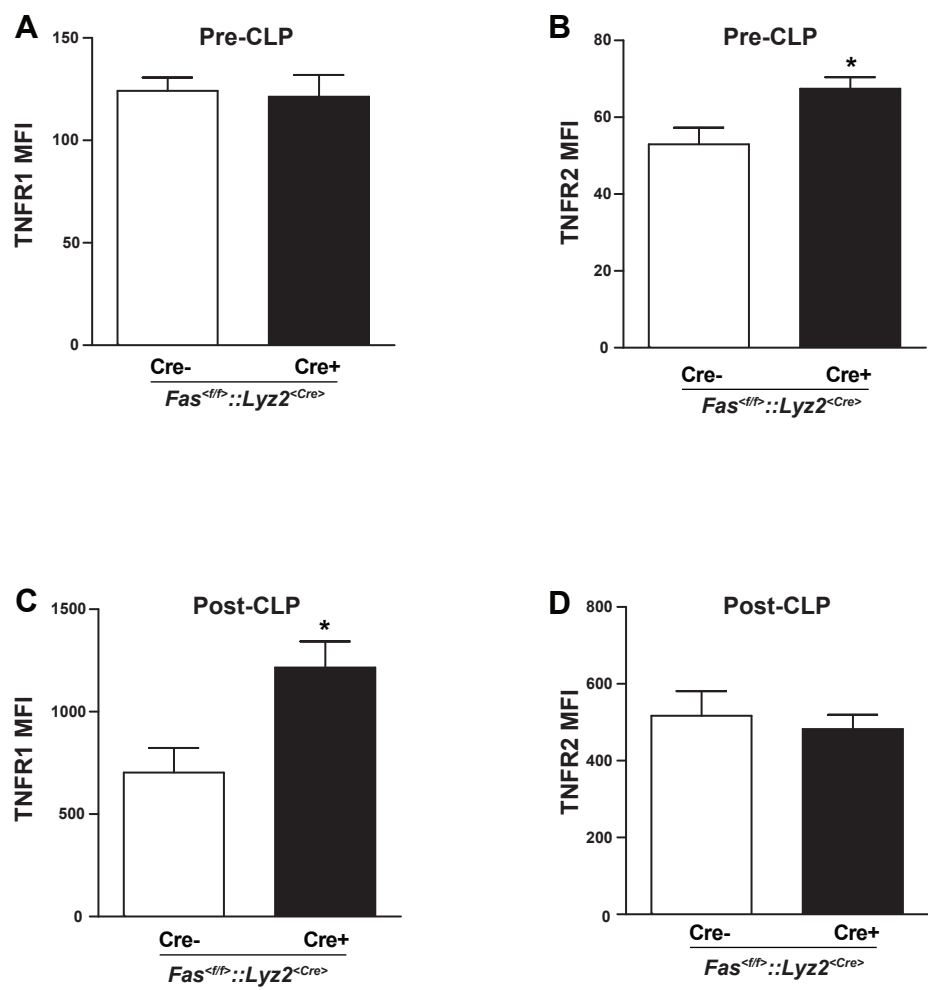

Supplement: supp [file elife-18542-supp-v1.zip]

Figure 2-figure supplement 2

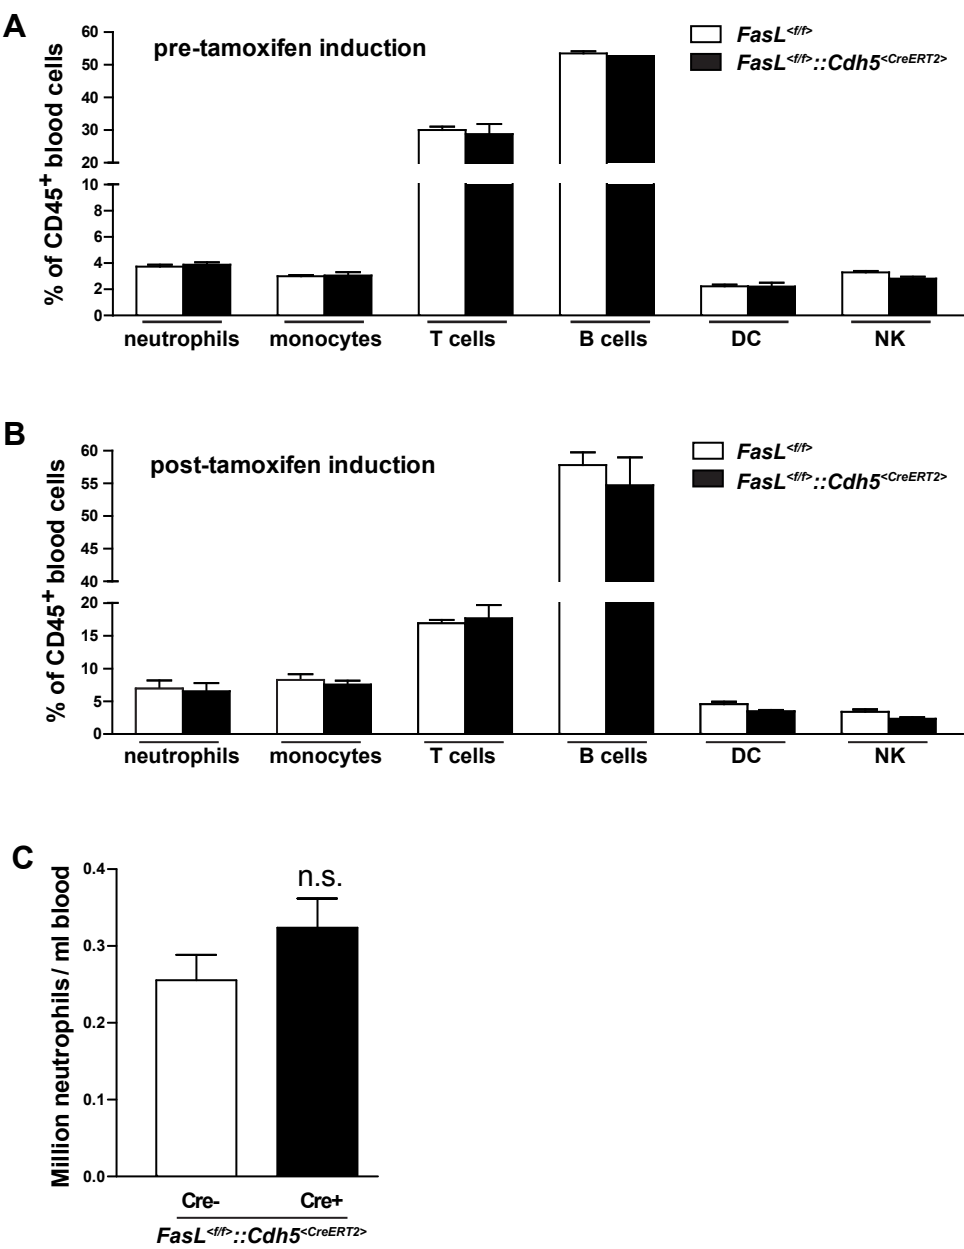

Supplement: supp [file elife-18542-supp-v1.zip]

Figure 1-figure supplement 1

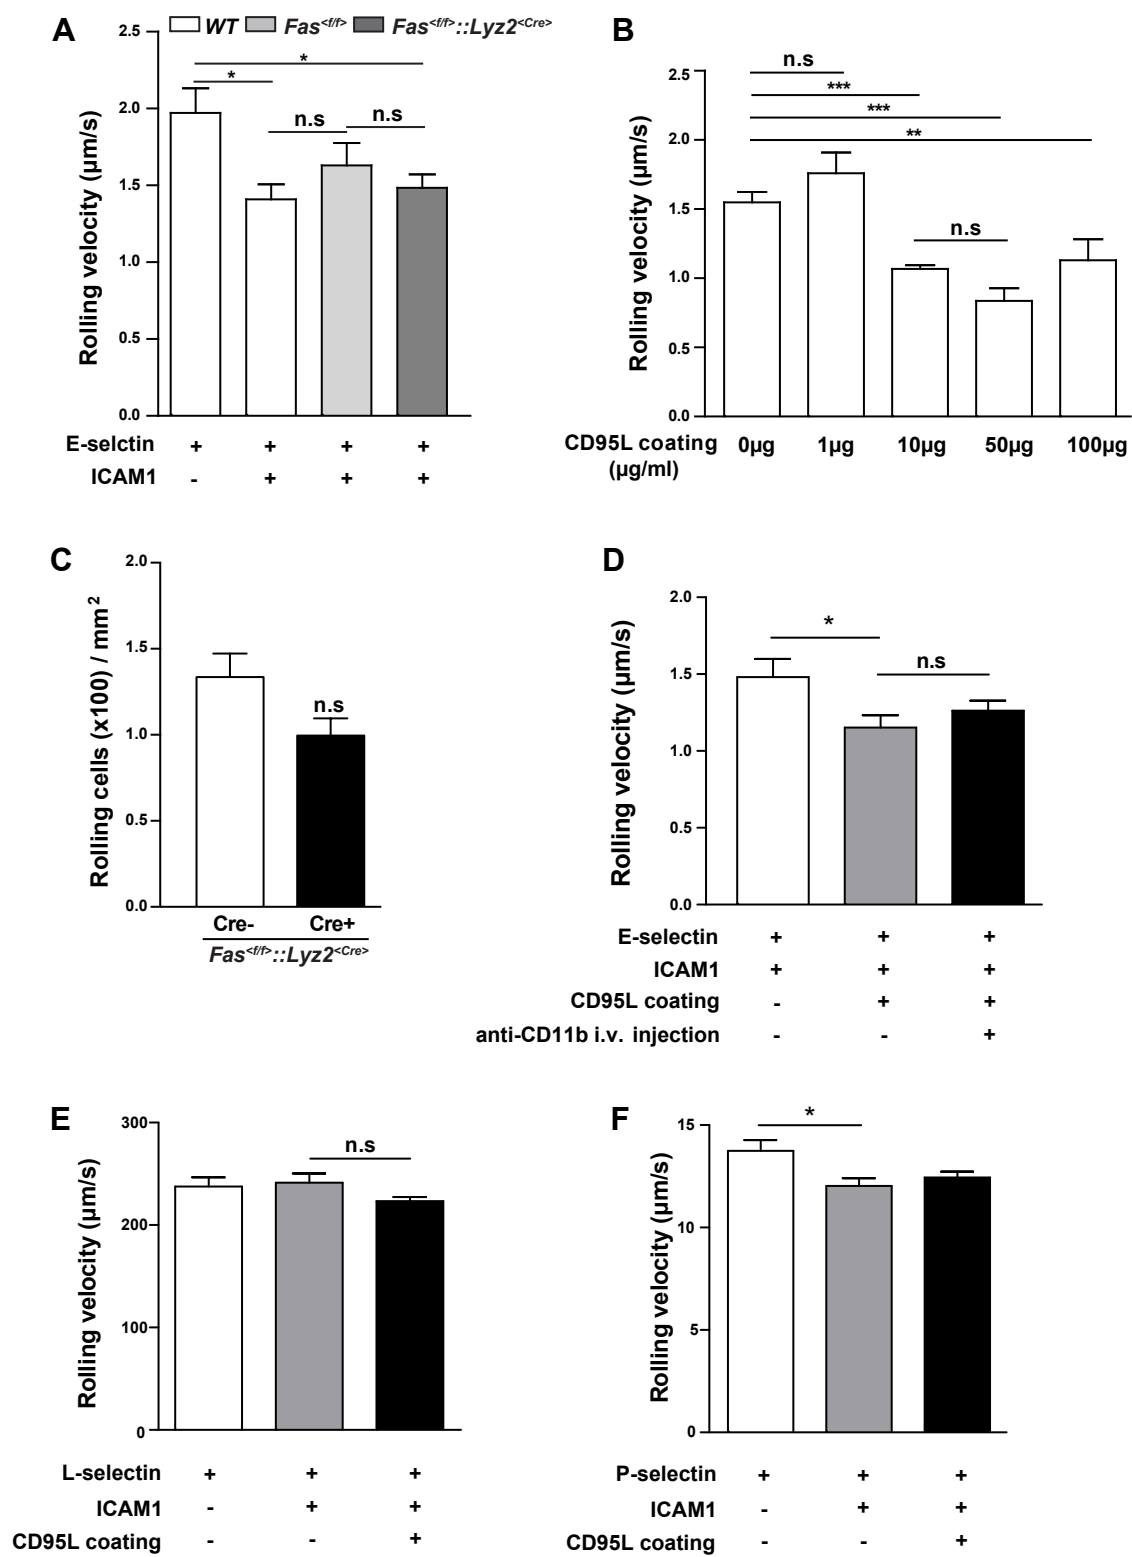

Supplement: supp [file elife-18542-supp-v1.zip]

Figure 1-figure supplement 3

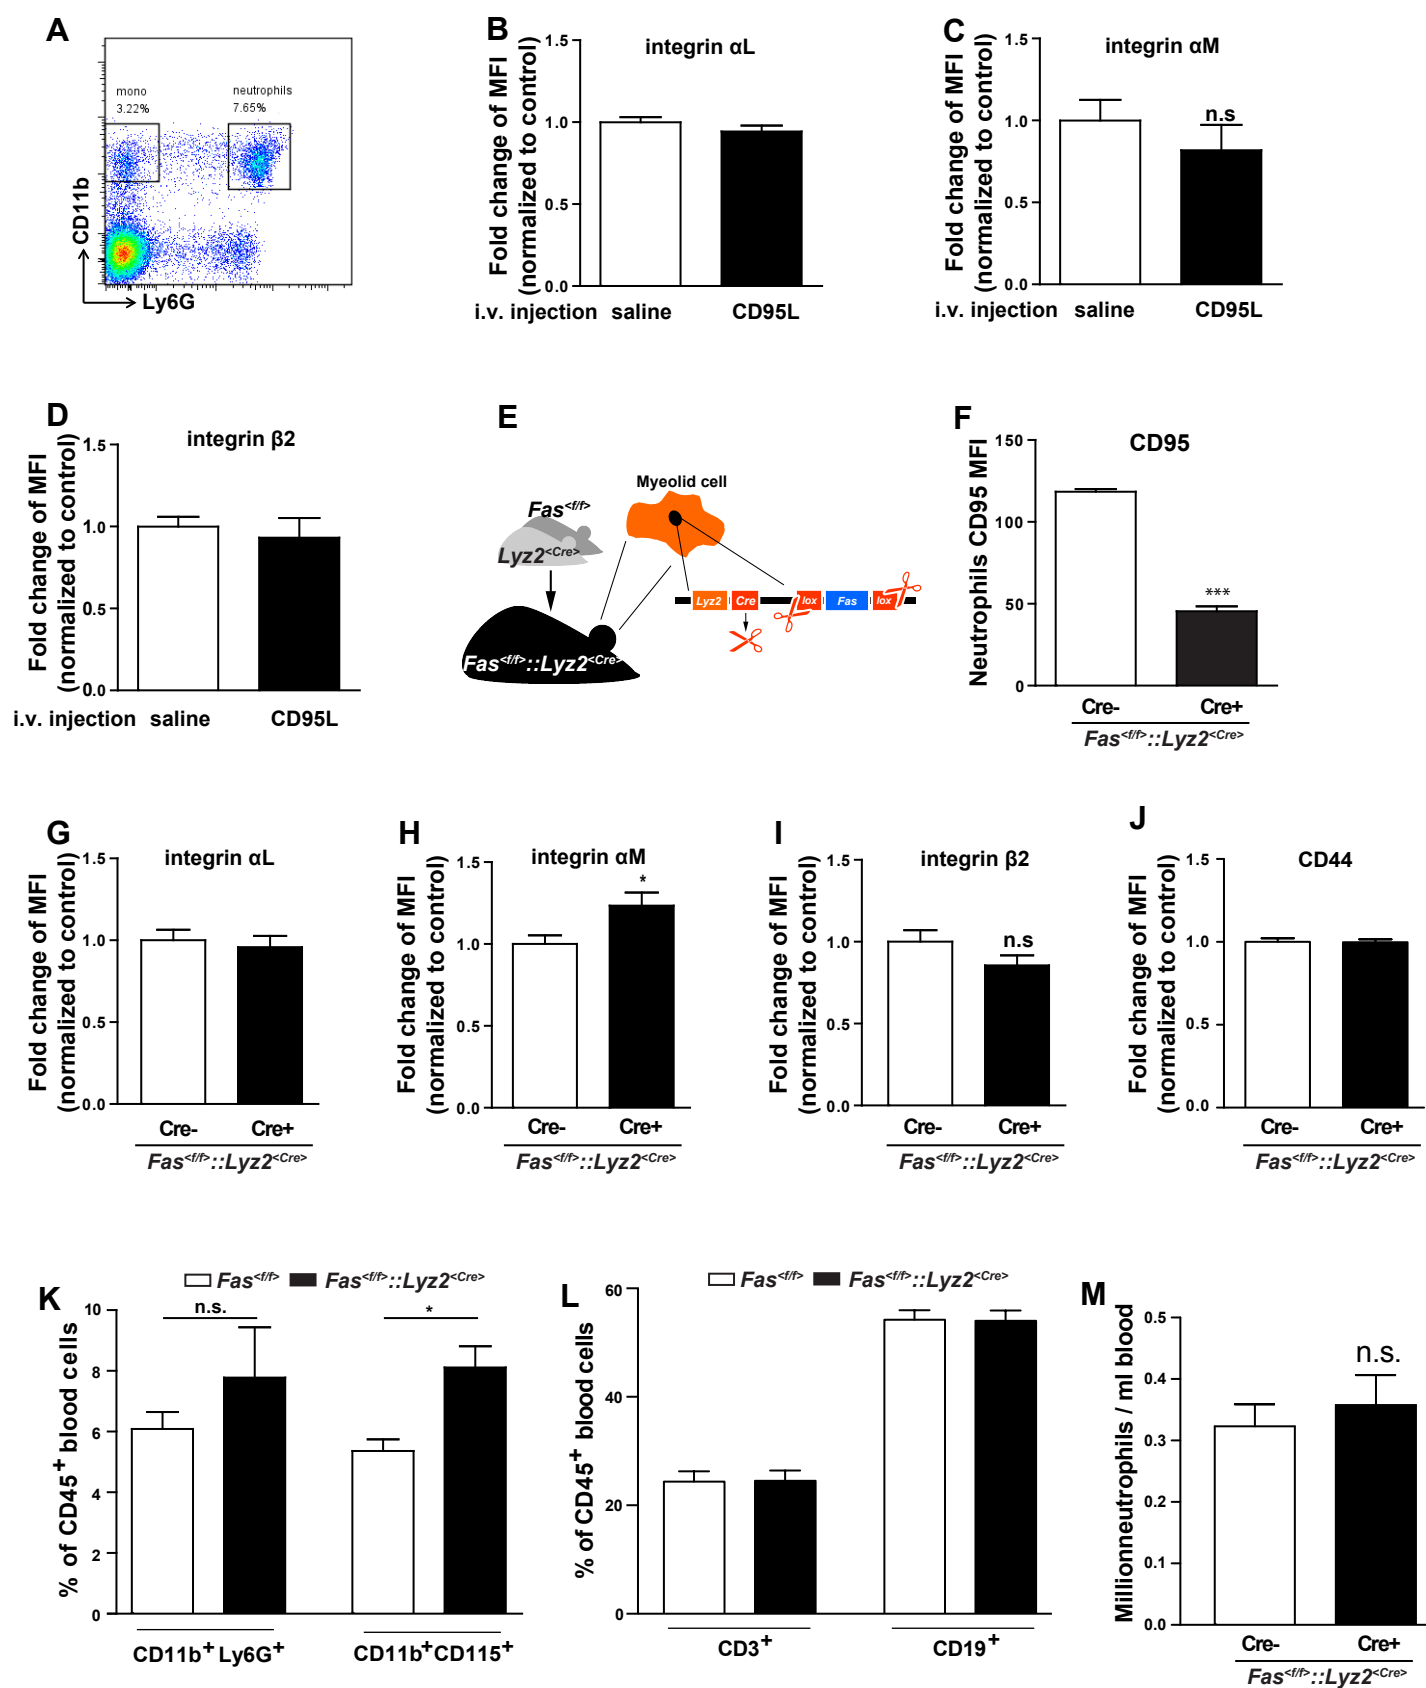

Supplement: supp [file elife-18542-supp-v1.zip]

Figure 4-figure supplement

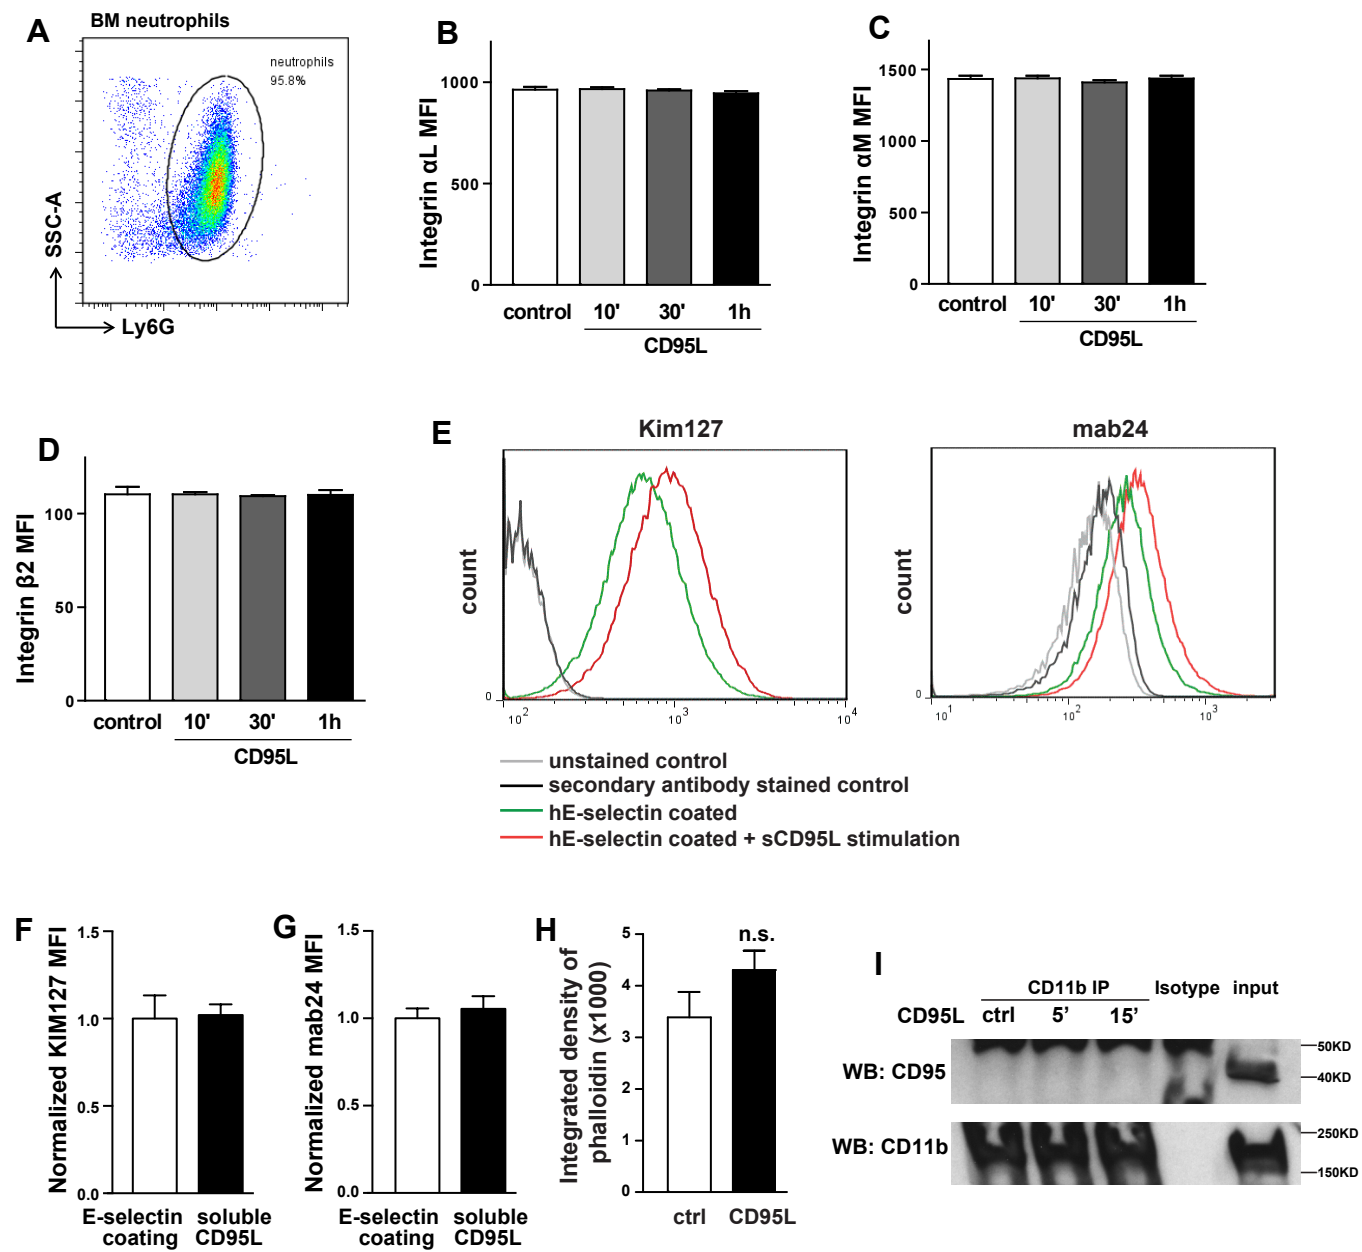

Supplement: supp [file elife-18542-supp-v1.zip]
